# Supplementary material for: Distribution, genetic characteristics and public health implications of Triatoma rubrofasciata, the vector of Chagas disease in Guangxi, China
Source: PubMed Central journal article supplement (PMC6972020; doi:10.1186/s13071-020-3903-z), 2020-01-20
Supplement: 13071_2020_3903_MOESM2_ESM.pdf [file 13071_2020_3903_MOESM2_ESM.pdf]

The alignment of 16S rRNA gene of *Triatoma rubrofasciata* from Guangxi

16BB-1 gtctggcctgcccaatgaggttttgatggccgcagtatcctaactgtgctaaggtagca  
16BB-2 gtctggcctgcccaatgaggttttgatggccgcagtatcctaactgtgctaaggtagca  
16YN-1 gtctggcctgcccaatgaggttttgatggccgcagtatcctaactgtgctaaggtagca  
16YN-2 gtctggcctgcccaatgaggttttgatggccgcagtatcctaactgtgctaaggtagca  
16FS-1 gtctggcctgcccaatgaggttttgatggccgcagtatcctaactgtgctaaggtagca  
16FS-2 gtctggcctgcccaatgaggttttgatggccgcagtatcctaactgtgctaaggtagca  
16LB gtctggcctgcccaatgaggttttgatggccgcagtatcctaactgtgctaaggtagca  
16NM-1 gtctggcctgcccaatgaggttttgatggccgcagtatcctaactgtgctaaggtagca  
16NM-2 gtctggcctgcccaatgaggttttgatggccgcagtatcctaactgtgctaaggtagca  
16BH gtctggcctgcccaatgaggttttgatggccgcagtatcctaactgtgctaaggtagca  
16HP-1 gtctggcctgcccaatgaggttttgatggccgcagtatcctaactgtgctaaggtagca  
16HP-2 gtctggcctgcccaatgaggttttgatggccgcagtatcctaactgtgctaaggtagca  
16HP-3 gtctggcctgcccaatgaggttttgatggccgcagtatcctaactgtgctaaggtagca  
\*\*\*\*\*

16BB-1 taatcatttgtcttttaattgagggcttgtatgaaaggttggacaagatattaactttct  
16BB-2 taatcatttgtcttttaattgagggcttgtatgaaaggttggacaagatattaactttct  
16YN-1 taatcatttgtcttttaattgagggcttgtatgaaaggttggacaagatattaactttct  
16YN-2 taatcatttgtcttttaattgagggcttgtatgaaaggttggacaagatattaactttct  
16FS-1 taatcatttgtcttttaattgagggcttgtatgaaaggttggacaagatattaactttct  
16FS-2 taatcatttgtcttttaattgagggcttgtatgaaaggttggacaagatattaactttct  
16LB taatcatttgtcttttaattgagggcttgtatgaaaggttggacaagatattaactttct  
16NM-1 taatcatttgtcttttaattgagggcttgtatgaaaggttggacaagatattaactttct  
16NM-2 taatcatttgtcttttaattgagggcttgtatgaaaggttggacaagatattaactttct  
16BH taatcatttgtcttttaattgagggcttgtatgaaaggttggacaagatattaactttct  
16HP-1 taatcatttgtcttttaattgagggcttgtatgaaaggttggacaagatattaactttct  
16HP-2 taatcatttgtcttttaattgagggcttgtatgaaaggttggacaagatattaactttct  
16HP-3 taatcatttgtcttttaattgagggcttgtatgaaaggttggacaagatattaactttct  
\*\*\*\*\*

16BB-1 ttaatttaatttaagaacttaatttttaagttaaaaagcctaaatTTTTTgttggacg  
16BB-2 ttaatttaatttaagaacttaatttttaagttaaaaagcctaaatTTTTTgttggacg  
16YN-1 ttaatttaatttaagaacttaatttttaagttaaaaagcctaaatTTTTTgttggacg  
16YN-2 ttaatttaatttaagaacttaatttttaagttaaaaagcctaaatTTTTTgttggacg  
16FS-1 ttaatttaatttaagaacttaatttttaagttaaaaagcctaaatTTTTTgttggacg  
16FS-2 ttaatttaatttaagaacttaatttttaagttaaaaagcctaaatTTTTTgttggacg  
16LB ttaatttaatttaagaacttaatttttaagttaaaaagcctaaatTTTTTgttggacg  
16NM-1 ttaatttaatttaagaacttaatttttaagttaaaaagcctaaatTTTTTgttggacg  
16NM-2 ttaatttaatttaagaacttaatttttaagttaaaaagcctaaatTTTTTgttggacg  
16BH ttaatttaatttaagaacttaatttttaagttaaaaagcctaaatTTTTTgttggacg  
16HP-1 ttaatttaatttaagaacttaatttttaagttaaaaagcctaaatTTTTTgttggacg  
16HP-2 ttaatttaatttaagaacttaatttttaagttaaaaagcctaaatTTTTTgttggacg  
16HP-3 ttaatttaatttaagaacttaatttttaagttaaaaagcctaaatTTTTTgttggacg  
\*\*\*\*\*

16BB-1 agaagaccctatagatccttatagtttttagtttttagtaatttagtggttaatttatttg  
16BB-2 agaagaccctatagatccttatagtttttagtttttagtaatttagtggttaatttatttg  
16YN-1 agaagaccctatagatccttatagtttttagtttttagtaatttagtggttaatttatttg  
16YN-2 agaagaccctatagatccttatagtttttagtttttagtaatttagtggttaatttatttg  
16FS-1 agaagaccctatagatccttatagtttttagtttttagtaatttagtggttaatttatttg  
16FS-2 agaagaccctatagatccttatagtttttagtttttagtaatttagtggttaatttatttg  
16LB agaagaccctatagatccttatagtttttagtttttagtaatttagtggttaatttatttg  
16NM-1 agaagaccctatagatccttatagtttttagtttttagtaatttagtggttaatttatttg  
16NM-2 agaagaccctatagatccttatagtttttagtttttagtaatttagtggttaatttatttg  
16BH agaagaccctatagatccttatagtttttagtttttagtaatttagtggttaatttatttg  
16HP-1 agaagaccctatagatccttatagtttttagtttttagtaatttagtggttaatttatttg  
16HP-2 agaagaccctatagatccttatagtttttagtttttagtaatttagtggttaatttatttg  
16HP-3 agaagaccctatagatccttatagtttttagtttttagtaatttagtggttaatttatttg  
\*\*\*\*\*

16BB-1 gagtgaaaaaattattttgttgggggactgtagaattttatgaacttctatttttatat  
16BB-2 gagtgaaaaaattattttgttgggggactgtagaattttatgaacttctatttttatat  
16YN-1 gagtgaaaaaattattttgttgggggactgtagaattttatgaacttctatttttatat  
16YN-2 gagtgaaaaaattattttgttgggggactgtagaattttatgaacttctatttttatat  
16FS-1 gagtgaaaaaattattttgttgggggactgtagaattttatgaacttctatttttatat

16FS-2 gagtgaaaaaattatTTTTgtTggggTgactgtagaattttatgaacttctatTTTTtatat  
16LB gagtgaaaaaattatTTTTgtTggggTgactgtagaattttatgaacttctatTTTTtatat  
16NM-1 gagtgaaaaaattatTTTTgtTggggTgactgtagaattttatgaacttctatTTTTtatat  
16NM-2 gagtgaaaaaattatTTTTgtTggggTgactgtagaattttatgaacttctatTTTTtatat  
16BH gagtgaaaaaattatTTTTgtTggggTgactgtagaattttatgaacttctatTTTTtatat  
16HP-1 gagtgaaaaaattatTTTTgtTggggTgactgtagaattttatgaacttctatTTTTtatat  
16HP-2 gagtgaaaaaattatTTTTgtTggggTgactgtagaattttatgaacttctatTTTTtatat  
16HP-3 gagtgaaaaaattatTTTTgtTggggTgactgtagaattttatgaacttctatTTTTtatat  
\*\*\*\*\*

16BB-1 ttcatatgTtagTgtTTTTtgatccatataTttatgattagaagattaagTtaccttag  
16BB-2 ttcatatgTtagTgtTTTTtgatccatataTttatgattagaagattaagTtaccttag  
16YN-1 ttcatatgTtagTgtTTTTtgatccatataTttatgattagaagattaagTtaccttag  
16YN-2 ttcatatgTtagTgtTTTTtgatccatataTttatgattagaagattaagTtaccttag  
16FS-1 ttcatatgTtagTgtTTTTtgatccatataTttatgattagaagattaagTtaccttag  
16FS-2 ttcatatgTtagTgtTTTTtgatccatataTttatgattagaagattaagTtaccttag  
16LB ttcatatgTtagTgtTTTTtgatccatataTttatgattagaagattaagTtaccttag  
16NM-1 ttcatatgTtagTgtTTTTtgatccatataTttatgattagaagattaagTtaccttag  
16NM-2 ttcatatgTtagTgtTTTTtgatccatataTttatgattagaagattaagTtaccttag  
16BH ttcatatgTtagTgtTTTTtgatccatataTttatgattagaagattaagTtaccttag  
16HP-1 ttcatatgTtagTgtTTTTtgatccatataTttatgattagaagattaagTtaccttag  
16HP-2 ttcatatgTtagTgtTTTTtgatccatataTttatgattagaagattaagTtaccttag  
16HP-3 ttcatatgTtagTgtTTTTtgatccatataTttatgattagaagattaagTtaccttag  
\*\*\*\*\*

16BB-1 ggataacagcGtaatttctTtgGagagTtcatattgataaaggagTtTgcGacctcgatg  
16BB-2 ggataacagcGtaatttctTtgGagagTtcatattgataaaggagTtTgcGacctcgatg  
16YN-1 ggataacagcGtaatttctTtgGagagTtcatattgataaaggagTtTgcGacctcgatg  
16YN-2 ggataacagcGtaatttctTtgGagagTtcatattgataaaggagTtTgcGacctcgatg  
16FS-1 ggataacagcGtaatttctTtgGagagTtcatattgataaaggagTtTgcGacctcgatg  
16FS-2 ggataacagcGtaatttctTtgGagagTtcatattgataaaggagTtTgcGacctcgatg  
16LB ggataacagcGtaatttctTtgGagagTtcatattgataaaggagTtTgcGacctcgatg  
16NM-1 ggataacagcGtaatttctTtgGagagTtcatattgataaaggagTtTgcGacctcgatg  
16NM-2 ggataacagcGtaatttctTtgGagagTtcatattgataaaggagTtTgcGacctcgatg  
16BH ggataacagcGtaatttctTtgGagagTtcatattgataaaggagTtTgcGacctcgatg  
16HP-1 ggataacagcGtaatttctTtgGagagTtcatattgataaaggagTtTgcGacctcgatg  
16HP-2 ggataacagcGtaatttctTtgGagagTtcatattgataaaggagTtTgcGacctcgatg  
16HP-3 ggataacagcGtaatttctTtgGagagTtcatattgataaaggagTtTgcGacctcgatg  
\*\*\*\*\*

16BB-1 ttggattaaaatgagTtatggatgcagaagTctatatactgggtctgttcgacccttaat  
16BB-2 ttggattaaaatgagTtatggatgcagaagTctatatactgggtctgttcgacccttaat  
16YN-1 ttggattaaaatgagTtatggatgcagaagTctatatactgggtctgttcgacccttaat  
16YN-2 ttggattaaaatgagTtatggatgcagaagTctatatactgggtctgttcgacccttaat  
16FS-1 ttggattaaaatgagTtatggatgcagaagTctatatactgggtctgttcgacccttaat  
16FS-2 ttggattaaaatgagTtatggatgcagaagTctatatactgggtctgttcgacccttaat  
16LB ttggattaaaatgagTtatggatgcagaagTctatatactgggtctgttcgacccttaat  
16NM-1 ttggattaaaatgagTtatggatgcagaagTctatatactgggtctgttcgacccttaat  
16NM-2 ttggattaaaatgagTtatggatgcagaagTctatatactgggtctgttcgacccttaat  
16BH ttggattaaaataagTtatggatgcagaagTctatacactgggtctgttcgacccttaat  
16HP-1 ttggattaaaataagTtatggatgcagaagTctatacactgggtctgttcgacccttaat  
16HP-2 ttggattaaaataagTtatggatgcagaagTctatacactgggtctgttcgacccttaat  
16HP-3 ttggattaaaataagTtatggatgcagaagTctatacactgggtctgttcgacccttaat  
\*\*\*\*\*, \*\*\*\*\*

16BB-1 tttttacatgatctgagTt  
16BB-2 tttttacatgatctgagTt  
16YN-1 tttttacatgatctgagTt  
16YN-2 tttttacatgatctgagTt  
16FS-1 tttttacatgatctgagTt  
16FS-2 tttttacatgatctgagTt  
16LB tttttacatgatctgagTt  
16NM-1 tttttacatgatctgagTt  
16NM-2 tttttacatgatctgagTt  
16BH tttttacatgatctgagTt  
16HP-1 tttttacatgatctgagTt  
16HP-2 tttttacatgatctgagTt  
16HP-3 tttttacatgatctgagTt  
\*\*\*\*\*

The alignment of 28S rRNA gene of *Triatoma rubrofasciata* from Guangxi

28BB-1 ctgactgatcgctgccgaccggtgtaaataagcactgtccaaggaactgtttaccaacag  
28BB-2 ctgactgatcgctgccgaccggtgtaaataagcactgtccaaggaactgtttaccaacag  
28YN-1 ctgactgatcgctgccgaccggtgtaaataagcactgtccaaggaactgtttaccaacag  
28YN-2 ctgactgatcgctgccgaccggtgtaaataagcactgtccaaggaactgtttaccaacag  
28BH ctgactgatcgctgccgaccggtgtaaataagcactgtccaaggaactgtttaccaacag  
28FS-1 ctgactgatcgctgccgaccggtgtaaataagcactgtccaaggaactgtttaccaacag  
28FS-2 ctgactgatcgctgccgaccggtgtaaataagcactgtccaaggaactgtttaccaacag  
28LB ctgactgatcgctgccgaccggtgtaaataagcactgtccaaggaactgtttaccaacag  
28NM-1 ctgactgatcgctgccgaccggtgtaaataagcactgtccaaggaactgtttaccaacag  
28NM-2 ctgactgatcgctgccgaccggtgtaaataagcactgtccaaggaactgtttaccaacag  
28HP-1 ctgactgatcgctgccgaccggtgt-aataagcactgtccaaggaactgtttaccaacag  
28HP-2 ctgactgatcgctgccgaccggtgt-aataagcactgtccaaggaactgtttaccaacag  
28HP-3 ctgactgatcgctgccgaccggtgt-aataagcactgtccaaggaactgtttaccaacag  
\*\*\*\*\*

28BB-1 taggtggaatagttagacggactaaaaaatccgactgaaactaat t t t t a a c c a a c c c a c  
28BB-2 taggtggaatagttagacggactaaaaaatccgactgaaactaat t t t t a a c c a a c c c a c  
28YN-1 taggtggaatagttagacggactaaaaaatccgactgaaactaat t t t t a a c c a a c c c a c  
28YN-2 taggtggaatagttagacggactaaaaaatccgactgaaactaat t t t t a a c c a a c c c a c  
28BH taggtggaatagttagacggactaaaaaatccgactgaaactaat t t t t a a c c a a c c c a c  
28FS-1 taggtggaatagttagacggactaaaaaatccgactgaaactaat t t t t a a c c a a c c c a c  
28FS-2 taggtggaatagttagacggactaaaaaatccgactgaaactaat t t t t a a c c a a c c c a c  
28LB taggtggaatagttagacggactaaaaaatccgactgaaactaat t t t t a a c c a a c c c a c  
28NM-1 taggtggaatagttagacggactaaaaaatccgactgaaactaat t t t t a a c c a a c c c a c  
28NM-2 taggtggaatagttagacggactaaaaaatccgactgaaactaat t t t t a a c c a a c c c a c  
28HP-1 taggtggaatagttagacggactaaaaaatccgactgaaactaat t t t t a a c c a a c c c a c  
28HP-2 taggtggaatagttagacggactaaaaaatccgactgaaactaat t t t t a a c c a a c c c a c  
28HP-3 taggtggaatagttagacggactaaaaaatccgactgaaactaat t t t t a a c c a a c c c a c  
\*\*\*\*\*

28BB-1 ttgcaaacagccacaaaaaaaaggacgacac t c c a t t a t a c a a a t a t a a t t t t g t a  
28BB-2 ttgcaaacagccacaaaaaaaaggacgacac t c c a t t a t a c a a a t a t a a t t t t g t a  
28YN-1 ttgcaaacagccacaaaaaaaaggacgacac t c c a t t a t a c a a a t a t a a t t t t g t a  
28YN-2 ttgcaaacagccacaaaaaaaaggacgacac t c c a t t a t a c a a a t a t a a t t t t g t a  
28BH ttgcaaacagccacaaaaaaaaggacgacac t c c a t t a t a c a a a t a t a a t t t t g t a  
28FS-1 ttgcaaacagccacaaaaaaaaggacgacac t c c a t t a t a c a a a t a t a a t t t t g t a  
28FS-2 ttgcaaacagccacaaaaaaaaggacgacac t c c a t t a t a c a a a t a t a a t t t t g t a  
28LB ttgcaaacagccacaaaaaaaaggacgacac t c c a t t a t a c a a a t a t a a t t t t g t a  
28NM-1 ttgcaaacagccacaaaaaaaaggacgacac t c c a t t a t a c a a a t a t a a t t t t g t a  
28NM-2 ttgcaaacagccacaaaaaaaaggacgacac t c c a t t a t a c a a a t a t a a t t t t g t a  
28HP-1 ttgcaaacagccacaaaaaaaaggacgacac t c c a t t a t a c a a a t a t a a t t t t g t a  
28HP-2 ttgcaaacagccacaaaaaaaaggacgacac t c c a t t a t a c a a a t a t a a t t t t g t a  
28HP-3 ttgcaaacagccacaaaaaaaaggacgacac t c c a t t a t a c a a a t a t a a t t t t g t a  
\*\*\*\*\*

28BB-1 caactttaagtggtcaacaccatcatctgctactgtcaaattatataccagtatacagtt  
28BB-2 caactttaagtggtcaacaccatcatctgctactgtcaaattatataccagtatacagtt  
28YN-1 caactttaagtggtcaacaccatcatctgctactgtcaaattatataccagtatacagtt  
28YN-2 caactttaagtggtcaacaccatcatctgctactgtcaaattatataccagtatacagtt  
28BH caactttaagtggtcaacaccatcatctgctactgtcaaattatataccagtatacagtt  
28FS-1 caactttaagtggtcaacaccatcatctgctactgtcaaattatataccagtatacagtt  
28FS-2 caactttaagtggtcaacaccatcatctgctactgtcaaattatataccagtatacagtt  
28LB caactttaagtggtcaacaccatcatctgctactgtcaaattatataccagtatacagtt  
28NM-1 caactttaagtggtcaacaccatcatctgctactgtcaaattatataccagtatacagtt  
28NM-2 caactttaagtggtcaacaccatcatctgctactgtcaaattatataccagtatacagtt  
28HP-1 caactttaagtggtcaacaccatcatctgctactgtcaaattatataccagtatacagtt  
28HP-2 caactttaagtggtcaacaccatcatctgctactgtcaaattatataccagtatacagtt  
28HP-3 caactttaagtggtcaacaccatcatctgctactgtcaaattatataccagtatacagtt  
\*\*\*\*\*

28BB-1 taacggctaaaactgttaaaaggcaaaatactttttacagtattccacacataaaaacagg  
28BB-2 taacggctaaaactgttaaaaggcaaaatactttttacagtattccacacataaaaacagg  
28YN-1 taacggctaaaactgttaaaaggcaaaatactttttacagtattccacacataaaaacagg  
28YN-2 taacggctaaaactgttaaaaggcaaaatactttttacagtattccacacataaaaacagg  
28BH taacggctaaaactgttaaaaggcaaaatactttttacagtattccacacataaaaacagg

28FS-1 taacggc taaaactgt taaaaggcaaaatact ttttacagtattccacactaaaaacagg  
28FS-2 taacggc taaaactgt taaaaggcaaaatact ttttacagtattccacactaaaaacagg  
28LB taacggc taaaactgt taaaaggcaaaatact ttttacagtattccacactaaaaacagg  
28NM-1 taacggc taaaactgt taaaaggcaaaatact ttttacagtattccacactaaaaacagg  
28NM-2 taacggc taaaactgt taaaaggcaaaatact ttttacagtattccacactaaaaacagg  
28HP-1 taacggc taaaactgt taaaaggcaaaatact ttttacagtattccacactaaaaacagg  
28HP-2 taacggc taaaactgt taaaaggcaaaatact ttttacagtattccacactaaaaacagg  
28HP-3 taacggc taaaactgt taaaaggcaaaatact ttttacagtattccacactaaaaacagg  
\*\*\*\*\*

28BB-1 caaattagccatacttaggatgttatttgacaggctgcaacgtcctactaagggagaa  
28BB-2 caaattagccatacttaggatgttatttgacaggctgcaacgtcctactaagggagaa  
28YN-1 caaattagccatacttaggatgttatttgacaggctgcaacgtcctactaagggagaa  
28YN-2 caaattagccatacttaggatgttatttgacaggctgcaacgtcctactaagggagaa  
28BH caaattagccatacttaggatgttatttgacaggctgcaacgtcctactaagggagaa  
28FS-1 caaattagccatacttaggatgttatttgacaggctgcaacgtcctactaagggagaa  
28FS-2 caaattagccatacttaggatgttatttgacaggctgcaacgtcctactaagggagaa  
28LB caaattagccatacttaggatgttatttgacaggctgcaacgtcctactaagggagaa  
28NM-1 caaattagccatacttaggatgttatttgacaggctgcaacgtcctactaagggagaa  
28NM-2 caaattagccatacttaggatgttatttgacaggctgcaacgtcctactaagggagaa  
28HP-1 caaattagccatacttaggatgttatttgacaggctgcaacgtcctactaagggagaa  
28HP-2 caaattagccatacttaggatgttatttgacaggctgcaacgtcctactaagggagaa  
28HP-3 caaattagccatacttaggatgttatttgacaggctgcaacgtcctactaagggagaa  
\*\*\*\*\*

28BB-1 gtgcggtccaccattaccatccaatttaa atgcgagcgaccaaacccactaccacagtt  
28BB-2 gtgcggtccaccattaccatccaatttaa atgcgagcgaccaaacccactaccacagtt  
28YN-1 gtgcggtccaccattaccatccaatttaa atgcgagcgaccaaacccactaccacagtt  
28YN-2 gtgcggtccaccattaccatccaatttaa atgcgagcgaccaaacccactaccacagtt  
28BH gtgcggtccaccattaccatccaatttaa atgcgagcgaccaaacccactaccacagtt  
28FS-1 gtgcggtccaccattaccatccaatttaa atgcgagcgaccaaacccactaccacagtt  
28FS-2 gtgcggtccaccattaccatccaatttaa atgcgagcgaccaaacccactaccacagtt  
28LB gtgcggtccaccattaccatccaatttaa atgcgagcgaccaaacccactaccacagtt  
28NM-1 gtgcggtccaccattaccatccaatttaa atgcgagcgaccaaacccactaccacagtt  
28NM-2 gtgcggtccaccattaccatccaatttaa atgcgagcgaccaaacccactaccacagtt  
28HP-1 gtgcggtccaccattaccatccaatttaa atgcgagcgaccaaacccactaccacagtt  
28HP-2 gtgcggtccaccattaccatccaatttaa atgcgagcgaccaaacccactaccacagtt  
28HP-3 gtgcggtccaccattaccatccaatttaa atgcgagcgaccaaacccactaccacagtt  
\*\*\*\*\*

28BB-1 gttacactgaatagggcgagaggccatctcaaatcatt taaaagttgagcaactggttaag  
28BB-2 gttacactgaatagggcgagaggccatctcaaatcatt taaaagttgagcaactggttaag  
28YN-1 gttacactgaatagggcgagaggccatctcaaatcatt taaaagttgagcaactggttaag  
28YN-2 gttacactgaatagggcgagaggccatctcaaatcatt taaaagttgagcaactggttaag  
28BH gttacactgaatagggcgagaggccatctcaaatcatt taaaagttgagcaactggttaag  
28FS-1 gttacactgaatagggcgagaggccatctcaaatcatt taaaagttgagcaactggttaag  
28FS-2 gttacactgaatagggcgagaggccatctcaaatcatt taaaagttgagcaactggttaag  
28LB gttacactgaatagggcgagaggccatctcaaatcatt taaaagttgagcaactggttaag  
28NM-1 gttacactgaatagggcgagaggccatctcaaatcatt taaaagttgagcaactggttaag  
28NM-2 gttacactgaatagggcgagaggccatctcaaatcatt taaaagttgagcaactggttaag  
28HP-1 gttacactgaatagggcgagaggccatctcaaatcatt taaaagttgagcaactggttaag  
28HP-2 gttacactgaatagggcgagaggccatctcaaatcatt taaaagttgagcaactggttaag  
28HP-3 gttacactgaatagggcgagaggccatctcaaatcatt taaaagttgagcaactggttaag  
\*\*\*\*\*

28BB-1 acgtgaatctcccctttcggatattcaggtctttccg tttaccctgagcggtttcacg  
28BB-2 acgtgaatctcccctttcggatattcaggtctttccg tttaccctgagcggtttcacg  
28YN-1 acgtgaatctcccctttcggatattcaggtctttccg tttaccctgagcggtttcacg  
28YN-2 acgtgaatctcccctttcggatattcaggtctttccg tttaccctgagcggtttcacg  
28BH acgtgaatctcccctttcggatattcaggtctttccg tttaccctgagcggtttcacg  
28FS-1 acgtgaatctcccctttcggatattcaggtctttccg tttaccctgagcggtttcacg  
28FS-2 acgtgaatctcccctttcggatattcaggtctttccg tttaccctgagcggtttcacg  
28LB acgtgaatctcccctttcggatattcaggtctttccg tttaccctgagcggtttcacg  
28NM-1 acgtgaatctcccctttcggatattcaggtctttccg tttaccctgagcggtttcacg  
28NM-2 acgtgaatctcccctttcggatattcaggtctttccg tttaccctgagcggtttcacg  
28HP-1 acgtgaatctcccctttcggatattcaggtctttccg tttaccctgagcggtttcacg  
28HP-2 acgtgaatctcccctttcggatattcaggtctttccg tttaccctgagcggtttcacg  
28HP-3 acgtgaatctcccctttcggatattcaggtctttccg tttaccctgagcggtttcacg  
\*\*\*\*\*

28BB-1 tactcttgaactctctcttcaaagttcttttcaactttccctcacgggtacttgttcgcta  
28BB-2 tactcttgaactctctcttcaaagttcttttcaactttccctcacgggtacttgttcgcta  
28YN-1 tactcttgaactctctcttcaaagttcttttcaactttccctcacgggtacttgttcgcta  
28YN-2 tactcttgaactctctcttcaaagttcttttcaactttccctcacgggtacttgttcgcta  
28BH tactcttgaactctctcttcaaagttcttttcaactttccctcacgggtacttgttcgcta  
28FS-1 tactcttgaactctctcttcaaagttcttttcaactttccctcacgggtacttgttcgcta  
28FS-2 tactcttgaactctctcttcaaagttcttttcaactttccctcacgggtacttgttcgcta  
28LB tactcttgaactctctcttcaaagttcttttcaactttccctcacgggtacttgttcgcta  
28NM-1 tactcttgaactctctcttcaaagttcttttcaactttccctcacgggtacttgttcgcta  
28NM-2 tactcttgaactctctcttcaaagttcttttcaactttccctcacgggtacttgttcgcta  
28HP-1 tactcttgaactctctcttcaaagttcttttcaactttccctcacgggtacttgttcgcta  
28HP-2 tactcttgaactctctcttcaaagttcttttcaactttccctcacgggtacttgttcgcta  
28HP-3 tactcttgaactctctcttcaaagttcttttcaactttccctcacgggtacttgttcgcta  
\*\*\*\*\*

28BB-1 tcggtctcgtggttgtatttagccttagatggagtttaccacctgcttagggctgcacta  
28BB-2 tcggtctcgtggttgtatttagccttagatggagtttaccacctgcttagggctgcacta  
28YN-1 tcggtctcgtggttgtatttagccttagatggagtttaccacctgcttagggctgcacta  
28YN-2 tcggtctcgtggttgtatttagccttagatggagtttaccacctgcttagggctgcacta  
28BH tcggtctcgtggttgtatttagccttagatggagtttaccacctgcttagggctgcacta  
28FS-1 tcggtctcgtggttgtatttagccttagatggagtttaccacctgcttagggctgcacta  
28FS-2 tcggtctcgtggttgtatttagccttagatggagtttaccacctgcttagggctgcacta  
28LB tcggtctcgtggttgtatttagccttagatggagtttaccacctgcttagggctgcacta  
28NM-1 tcggtctcgtggttgtatttagccttagatggagtttaccacctgcttagggctgcacta  
28NM-2 tcggtctcgtggttgtatttagccttagatggagtttaccacctgcttagggctgcacta  
28HP-1 tcggtctcgtggttgtatttagccttagatggagtttaccacctgcttagggctgcacta  
28HP-2 tcggtctcgtggttgtatttagccttagatggagtttaccacctgcttagggctgcacta  
28HP-3 tcggtctcgtggttgtatttagccttagatggagtttaccacctgcttagggctgcacta  
\*\*\*\*\*

28BB-1 tcaagc  
28BB-2 tcaagc  
28YN-1 tcaagc  
28YN-2 tcaagc  
28BH tcaagc  
28FS-1 tcaagc  
28FS-2 tcaagc  
28LB tcaagc  
28NM-1 tcaagc  
28NM-2 tcaagc  
28HP-1 tcaagc  
28HP-2 tcaagc  
28HP-3 tcaagc  
\*\*\*\*\*

The alignment of Cytb gene of *Triatoma rubrofasciata* from Guangxi

BB-1 ttattatggatcatataaattattcatgacttgaagcattggggtgattttattattcat  
BB-2 ttattatggatcatataaattattcatgacttgaagcattggggtgattttattattcat  
YN-1 ttattatggatcatataaattattcatgacttgaagcattggggtgattttattattcat  
YN-2 ttattatggatcatataaattattcatgacttgaagcattggggtgattttattattcat  
FS-1 ttattatggatcatataaattattcatgacttgaagcattggggtgattttattattcat  
FS-2 ttattatggatcatataaattattcatgacttgaagcattggggtgattttattattcat  
LB ttattatggatcatataaattattcatgacttgaagcattggggtgattttattattcat  
NM-1 ttattatggatcatataaattattcatgacttgaagcattggggtgattttattattcat  
NM-2 ttattatggatcatataaattattcatgacttgaagcattggggtgattttattattcat  
BH ttattatggatcatataaattattcatgacttgaagcattggggtgattttattattcat  
HP-1 ttattatggatcatataaattattcatgacttgaagcattggggtgattttattattcat  
HP-2 ttattatggatcatataaattattcatgacttgaagcattggggtgattttattattcat  
HP-3 ttattatggatcatataaattattcatgacttgaagcattggggtgattttattattcat  
\*\*\*\*\*

BB-1 aattataggaactgcatttttagggatgtcttaccctgaggacaaatatccttatgagg  
BB-2 aattataggaactgcatttttagggatgtcttaccctgaggacaaatatccttatgagg  
YN-1 aattataggaactgcatttttagggatgtcttaccctgaggacaaatatccttatgagg  
YN-2 aattataggaactgcatttttagggatgtcttaccctgaggacaaatatccttatgagg  
FS-1 aattataggaactgcatttttagggatgtcttaccctgaggacaaatatccttatgagg  
FS-2 aattataggaactgcatttttagggatgtcttaccctgaggacaaatatccttatgagg  
LB aattataggaactgcatttttagggatgtcttaccctgaggacaaatatccttatgagg  
NM-1 aattataggaactgcatttttagggatgtcttaccctgaggacaaatatccttatgagg  
NM-2 aattataggaactgcatttttagggatgtcttaccctgaggacaaatatccttatgagg  
BH aattataggaactgcatttttagggatgtcttaccctgaggacaaatatccttatgagg  
HP-1 aattataggaactgcatttttagggatgtcttaccctgaggacaaatatccttatgagg  
HP-2 aattataggaactgcatttttagggatgtcttaccctgaggacaaatatccttatgagg  
HP-3 aattataggaactgcatttttagggatgtcttaccctgaggacaaatatccttatgagg  
\*\*\*\*\*

BB-1 agcaacagttattactaaccttggtatctgctatcccgtacttaggaaatgacttagtcat  
BB-2 agcaacagttattactaaccttggtatctgctatcccgtacttaggaaatgacttagtcat  
YN-1 agcaacagttattactaaccttggtatctgctatcccgtacttaggaaatgacttagtcat  
YN-2 agcaacagttattactaaccttggtatctgctatcccgtacttaggaaatgacttagtcat  
FS-1 agcaacagttattactaaccttggtatctgctatcccgtacttaggaaatgacttagtcat  
FS-2 agcaacagttattactaaccttggtatctgctatcccgtacttaggaaatgacttagtcat  
LB agcaacagttattactaaccttggtatctgctatcccgtacttaggaaatgacttagtcat  
NM-1 agcaacagttattactaaccttggtatctgctatcccgtacttaggaaatgacttagtcat  
NM-2 agcaacagttattactaaccttggtatctgctatcccgtacttaggaaatgacttagtcat  
BH agcaacagttattactaaccttggtatctgctatcccgtacttaggaaatgacttagtcat  
HP-1 agcaacagttattactaaccttggtatctgctatcccgtacttaggaaatgacttagtcat  
HP-2 agcaacagttattactaaccttggtatctgctatcccgtacttaggaaatgacttagtcat  
HP-3 agcaacagttattactaaccttggtatctgctatcccgtacttaggaaatgacttagtcat  
\*\*\*\*\*

BB-1 atgattatgaggggatttcagtagataacgctactttaactcgattctttgcccata  
BB-2 atgattatgaggggatttcagtagataacgctactttaactcgattctttgcccata  
YN-1 atgattatgaggggatttcagtagataacgctactttaactcgattctttgcccata  
YN-2 atgattatgaggggatttcagtagataacgctactttaactcgattctttgcccata  
FS-1 atgattatgaggggatttcagtagataacgctactttaactcgattctttgcccata  
FS-2 atgattatgaggggatttcagtagataacgctactttaactcgattctttgcccata  
LB atgattatgaggggatttcagtagataacgctactttaactcgattctttgcccata  
NM-1 atgattatgaggggatttcagtagataacgctactttaactcgattctttgcccata  
NM-2 atgattatgaggggatttcagtagataacgctactttaactcgattctttgcccata  
BH atgattatgaggggatttcagtagataacgctactttaactcgattctttgcccata  
HP-1 atgattatgaggggatttcagtagataacgctactttaactcgattctttgcccata  
HP-2 atgattatgaggggatttcagtagataacgctactttaactcgattctttgcccata  
HP-3 atgattatgaggggatttcagtagataacgctactttaactcgattctttgcccata  
\*\*\*\*\*

BB-1 tttcctttaccattcattatgagcatttagtattaatccattactctttctccatca  
BB-2 tttcctttaccattcattatgagcatttagtattaatccattactctttctccatca  
YN-1 tttcctttaccattcattatgagcatttagtattaatccattactctttctccatca  
YN-2 tttcctttaccattcattatgagcatttagtattaatccattactctttctccatca  
FS-1 tttcctttaccattcattatgagcatttagtattaatccattactctttctccatca  
FS-2 tttcctttaccattcattatgagcatttagtattaatccattactctttctccatca  
LB tttcctttaccattcattatgagcatttagtattaatccattactctttctccatca  
NM-1 tttcctttaccattcattatgagcatttagtattaatccattactctttctccatca  
NM-2 tttcctttaccattcattatgagcatttagtattaatccattactctttctccatca  
BH tttcctttaccattcattatgagcatttagtattaatccattactctttctccatca  
HP-1 tttcctttaccattcattatgagcatttagtattaatccattactctttctccatca  
HP-2 tttcctttaccattcattatgagcatttagtattaatccattactctttctccatca  
HP-3 tttcctttaccattcattatgagcatttagtattaatccattactctttctccatca  
\*\*\*\*\*

BB-1 aacaggatcctaataatccattaggattaaatagaaatgataaaatcccatttcacc  
BB-2 aacaggatcctaataatccattaggattaaatagaaatgataaaatcccatttcacc  
YN-1 aacaggatcctaataatccattaggattaaatagaaatgataaaatcccatttcacc  
YN-2 aacaggatcctaataatccattaggattaaatagaaatgataaaatcccatttcacc  
FS-1 aacaggatcctaataatccattaggattaaatagaaatgataaaatcccatttcacc  
FS-2 aacaggatcctaataatccattaggattaaatagaaatgataaaatcccatttcacc  
LB aacaggatcctaataatccattaggattaaatagaaatgataaaatcccatttcacc  
NM-1 aacaggatcctaataatccattaggattaaatagaaatgataaaatcccatttcacc

NM-2 aacaggatcctaataatccattaggattaaatagaaatTTTgataaaatcccatttcacc  
BH aacaggatcctaataatccattaggattaaatagaaatTTTgataaaatcccatttcacc  
HP-1 aacaggatcctaataatccattaggattaaatagaaatTTTgataaaatcccatttcacc  
HP-2 aacaggatcctaataatccattaggattaaatagaaatTTTgataaaatcccatttcacc  
HP-3 aacaggatcctaataatccattaggattaaatagaaatTTTgataaaatcccatttcacc  
\*\*\*\*\*

BB-1 atatttctctattaaagaccttataggagtatcaataacccttatattctttatcctact  
BB-2 atatttctctattaaagaccttataggagtatcaataacccttatattctttatcctact  
YN-1 atatttctctattaaagaccttataggagtatcaataacccttatattctttatcctact  
YN-2 atatttctctattaaagaccttataggagtatcaataacccttatattctttatcctact  
FS-1 atatttctctattaaagaccttataggagtatcaataacccttatattctttatcctact  
FS-2 atatttctctattaaagaccttataggagtatcaataacccttatattctttatcctact  
LB atatttctctattaaagaccttataggagtatcaataacccttatattctttatcctact  
NM-1 atatttctctattaaagaccttataggagtatcaataacccttatattctttatcctact  
NM-2 atatttctctattaaagaccttataggagtatcaataacccttatattctttatcctact  
BH atatttctctattaaagaccttataggagtatcaataacccttatattctttatcctact  
HP-1 atatttctctattaaagaccttataggagtatcaataacccttatattctttatcctact  
HP-2 atatttctctattaaagaccttataggagtatcaataacccttatattctttatcctact  
HP-3 atatttctctattaaagaccttataggagtatcaataacccttatattctttatcctact  
\*\*\*\*\*. \*\*\*\*\*

BB-1 aaaccttggagaacctcgattattgggagacctgaaaactttatcccagccaaccatt  
BB-2 aaaccttggagaacctcgattattgggagacctgaaaactttatcccagccaaccatt  
YN-1 aaaccttggagaacctcgattattgggagacctgaaaactttatcccagccaaccatt  
YN-2 aaaccttggagaacctcgattattgggagacctgaaaactttatcccagccaaccatt  
FS-1 aaaccttggagaacctcgattattgggagacctgaaaactttatcccagccaaccatt  
FS-2 aaaccttggagaacctcgattattgggagacctgaaaactttatcccagccaaccatt  
LB aaaccttggagaacctcgattattgggagacctgaaaactttatcccagccaaccatt  
NM-1 aaaccttggagaacctcgattattgggagacctgaaaactttatcccagccaaccatt  
NM-2 aaaccttggagaacctcgattattgggagacctgaaaactttatcccagccaaccatt  
BH aaaccttggagaacctcgattattgggagacctgaaaactttatcccagccaaccatt  
HP-1 aaaccttggagaacctcgattattgggagacctgaaaactttatcccagccaaccatt  
HP-2 aaaccttggagaacctcgattattgggagacctgaaaactttatcccagccaaccatt  
HP-3 aaaccttggagaacctcgattattgggagacctgaaaactttatcccagccaaccatt  
\*\*\*\*\*

BB-1 agttacccgggttcatatccaaccagaatggatTTTctatttgcatacgaattctacg  
BB-2 agttacccgggttcatatccaaccagaatggatTTTctatttgcatacgaattctacg  
YN-1 agttacccgggttcatatccaaccagaatggatTTTctatttgcatacgaattctacg  
YN-2 agttacccgggttcatatccaaccagaatggatTTTctatttgcatacgaattctacg  
FS-1 agttacccgggttcatatccaaccagaatggatTTTctatttgcatacgaattctacg  
FS-2 agttacccgggttcatatccaaccagaatggatTTTctatttgcatacgaattctacg  
LB agttacccgggttcatatccaaccagaatggatTTTctatttgcatacgaattctacg  
NM-1 agttacccgggttcatatccaaccagaatggatTTTctatttgcatacgaattctacg  
NM-2 agttacccgggttcatatccaaccagaatggatTTTctatttgcatacgaattctacg  
BH agttacccgggttcatatccaaccagaatggatTTTctatttgcatacgaattctacg  
HP-1 agttacccgggttcatatccaaccagaatggatTTTctatttgcatacgaattctacg  
HP-2 agttacccgggttcatatccaaccagaatggatTTTctatttgcatacgaattctacg  
HP-3 agttacccgggttcatatccaaccagaatggatTTTctatttgcatacgaattctacg  
\*\*\*\*\*

BB-1 atctattcctaataaactaggaggggtaattgcaatagtTTTcttccatcataattattat  
BB-2 atctattcctaataaactaggaggggtaattgcaatagtTTTcttccatcataattattat  
YN-1 atctattcctaataaactaggaggggtaattgcaatagtTTTcttccatcataattattat  
YN-2 atctattcctaataaactaggaggggtaattgcaatagtTTTcttccatcataattattat  
FS-1 atctattcctaataaactaggaggggtaattgcaatagtTTTcttccatcataattattat  
FS-2 atctattcctaataaactaggaggggtaattgcaatagtTTTcttccatcataattattat  
LB atctattcctaataaactaggaggggtaattgcaatagtTTTcttccatcataattattat  
NM-1 atctattcctaataaactaggaggggtaattgcaatagtTTTcttccatcataattattat  
NM-2 atctattcctaataaactaggaggggtaattgcaatagtTTTcttccatcataattattat  
BH atctattcctaataaactaggaggggtaattgcaatagtTTTcttccatcataattattat  
HP-1 atctattcctaataaactaggaggggtaattgcaatagtTTTcttccatcataattattat  
HP-2 atctattcctaataaactaggaggggtaattgcaatagtTTTcttccatcataattattat  
HP-3 atctattcctaataaactaggaggggtaattgcaatagtTTTcttccatcataattattat  
\*\*\*\*\*. \*\*\*\*\*

BB-1 aattctaccaattaccaacaaaagaaaatttcaaggaatttctttttatccaataaatca  
BB-2 aattctaccaattaccaacaaaagaaaatttcaaggaatttctttttatccaataaatca

YN-1 aattctaccaattaccaacaaaagaaaatttcaaggaatttctttttatccaataaatca  
 YN-2 aattctaccaattaccaacaaaagaaaatttcaaggaatttctttttatccaataaatca  
 FS-1 aattctaccaattaccaacaaaagaaaatttcaaggaatttctttttatccaataaatca  
 FS-2 aattctaccaattaccaacaaaagaaaatttcaaggaatttctttttatccaataaatca  
 LB aattctaccaattaccaacaaaagaaaatttcaaggaatttctttttatccaataaatca  
 NM-1 aattctaccaattaccaacaaaagaaaatttcaaggaatttctttttatccaataaatca  
 NM-2 aattctaccaattaccaacaaaagaaaatttcaaggaatttctttttatccaataaatca  
 BH aattctaccaattaccaacaaaagaaaatttcaaggaatttctttttatccaataaatca  
 HP-1 aattctaccaattaccaacaaaagaaaatttcaaggaatttctttttatccaataaatca  
 HP-2 aattctaccaattaccaacaaaagaaaatttcaaggaatttctttttatccaataaatca  
 HP-3 aattctaccaattaccaacaaaagaaaatttcaaggaatttctttttatccaataaatca  
 \*\*\*\*\*

BB-1 agtatct  
 BB-2 agtatct  
 YN-1 agtatct  
 YN-2 agtatct  
 FS-1 agtatct  
 FS-2 agtatct  
 LB agtatct  
 NM-1 agtatct  
 NM-2 agtatct  
 BH agtatct  
 HP-1 agtatct  
 HP-2 agtatct  
 HP-3 agtatct  
 \*\*\*\*\*

Note: The 16S rRNA, 28S rRNA and cytochrome b (CytB) sequences of 13 *Triatoma rubrofasciata* from Guangxi were aligned by MAFFT (<https://mafft.cbrc.jp/alignment/server/>).
