# Supplementary material for: Distribution, genetic characteristics and public health implications of Triatoma rubrofasciata, the vector of Chagas disease in Guangxi, China
Source: Parasit Vectors. 2020 Jan 20;13:33. doi: 10.1186/s13071-020-3903-z (PMC6972020; doi:10.1186/s13071-020-3903-z)
Supplement: Supplementary file 1 — Additional file 1: Table S1. Data for T. rubrofasciata collected in Guangxi, China. [file 13071_2020_3903_MOESM1_ESM.xlsx]

## Sheet: Table S1
			Additional file 1: Table S1. Data for T. rubrofasciata collected in Guangxi Province, China.
City	County (District)	Address	Latitude	Longitude	Zoning code	Discovery method	identified method	Collected bugs No.
Baise	Pingguo	Sanzhong Road, Pinggguo County	23.3293	107.59	451023100001	Locals found	MI	0
Beihai	Hepu	Changle Town, Hepu county	21.8213	109.414	450521112001	Locals found	MB	6
Beihai	Haicheng	Donglifengshi Community, Haijiao Street, Haicheng District	21.4739	109.108	450502004002	Locals found	MB	4
Beihai	Hepu	No 111, Gongyuan Road, Hepu County	21.6609	109.207	450521100001	Locals found	MB	3
Beihai	Haicheng	Malan Villiage, Haicheng District	21.4789	109.185	450521106001	Locals found	MB	3
Guigang	Pingnan	No.44 Bada street, Pingnan County	23.5432	110.394	450821100004	Locals found	MI	0
Guigang	Qintang	Cement plant, Huangli Town, Qintang Distrcit	23.1559	109.321	450804103001	Locals found	MI	0
Hechi	Nandan	No.851 County Road, Nandan County	24.9754	107.542	451221100001	Locals found	MI	0
Hezhou	Babu	Liuhe Villiage, Pumen Town, Babu District	23.9125	111.726	451102117203	Locals found	MB	1
Liuzhou	Liujiang	Chuanshan Town, Liujiang District	24.0317	109.407	450206109001	Locals found	MB	3
Liuzhou	Liunan	No.11, Hangling Road,Liunan Distrct	24.2703	109.382	450204000000	Locals found	MB	4
Nanning	Hengxian	Lingli Village, Taoxu Town, Hengxian County	22.8089	109.15	450127112213	Locals found	MB	1
Nanning	Jiangnan	Guangming Road, Jiangnan District	22.6457	108.219	450105102001	Locals found	MB	4
Nanning	Jiangnan	Nanxiang Village, Shajing Town, Jiangnan District	22.8149	108.25	450105003211	Locals found	MB	1
Nanning	Jiangnan	Nanyili, Dancun Road, Jiangnan District	22.7995	108.304	450105001001	Locals found	MB	5
Nanning	Jiangnan	No.4 Tinghong Road, Jiangnan District	22.7903	108.32	450105001013	Locals found	MB	1
Nanning	Jiangnan	Zhengfeng Paper mill, Tuntou Village, Wuyixi Road, Jiangnan District	22.7923	108.253	450105002009	Locals found	MI	0
Nanning	Jiangnan	Wuxiang sewage-treatment plant,Yudong avenue, Jiannan District	22.7387	108.358	450108002203	Locals found	MB	1
Nanning	Liangqing	Wuxiang Ridges,Liangqing District	22.7502	108.349	450108001002	Locals found	MB	5
Nanning	Longan	Botanguanghong Pharmaceutical Company Dormitory,Longan District.	23.1647	107.74	450123100203	Locals found	MB	1
Nanning	Longan	Bolang Village, Qiaojian Town, Longan County	23.0922	107.767	450123104211	Locals found	MB	3
Nanning	Longan	Bolang Village, Qiaojian Town, Longan County	23.095	107.762	450123104211	Locals found	MB	6
Nanning	Qingxiu	Fenglin Road,Qingxiu District	22.8166	108.415	450103004010	Locals found	MB	1
Nanning	Qingxiu	Liuxu Town, Qingxiu District	22.7257	108.644	450103100002	Locals found	MB	3
Nanning	Qingxiu	Xinguang Village, Nanyang Town, Qingxiu District	22.7637	108.799	450103101207	Locals found	MB	4
Nanning	Qingxiu	Nanyang Village, Nanyang Town,Qingxiu District	22.7666	108.795	450103101207	Locals found	MB	2
Nanning	Wuming	Yiling Rock Apiculture Farm, Wuming District	23.0366	108.296	450110103214	Locals found	MB	1
Nanning	Xixiangtang	Lin Village, Anji Avenue, Xixiangtang District	22.8993	108.292	450107008001	Locals found	MB	3
Nanning	Xixiangtang	Beihu Village, Xixiangtang District	22.8522	108.322	450107008201	Locals found	MB	1
Nanning	Xixiangtang	No.12 Kexing Road, Xixiangtang District	22.8628	108.281	450107008203	Locals found	MB	3
Nanning	Xixiangtang	Nanbu No 2 Living area,Xixiangtang District	22.8195	108.187	450107009002	Locals found	MB	1
Nanning	Xixiangtang	Caiyi Craft Factory,Yunayi Road,Xixiangtang District	22.8858	108.32	450107008204	Locals found	MB	4
Nanning	Yongning	Zhonghe Conmunity,Zhonghe Town, Yongning District	22.6868	108.749	450109202001	Locals found	MB	2
Nanning	xingning	Taihua Medicine, Jinrun Road, Xingning District	22.876	108.398	450102002001	Locals found	MB	1
Nanning	xingning	No 1, Beiyili, Renmin Road,, Xingning District	22.8264	108.326	450102002023	Locals found	MB	2
Nanning	xingning	Sitang Comunity, Xingning District	22.9138	108.487	450102001004	Locals found	MB	1
Nanning	xingning	Ruijingjiayuan Comunity, Yongwu Dong Road, Xingning District	22.8705	108.336	450102002001	Locals found	MB	1
Nanning	xingning	No.155 Changgang Road, Xingning District	22.8365	108.358	450102001016	Locals found	MB	2
Nanning	xingning	No 4 Group,Changgang Road, Xingning District	22.8438	108.361	450102001014	Locals found	MB	1
Qinzhou	Qinan	No 16, Beihuanxi Road,Qinnan District	21.9876	108.635	450703002002	Locals found	MB	2
Wuzhou	Wanxiu	No 73 Dieshan Road, Wanxiu District	23.4805	111.306	450403007002	Locals found	MI	0
Yunlin	Bobai	Leibu Village, Bai Town, Bobai County	22.2456	109.972	450923100214	Locals found	MI	0
Yunlin	Xingye	Qitun Comunity, Shinan Town, Xingye County	22.7398	109.878	450924100001	Locals found	MI	0
Yunlin	Bobai	Xicheng development zone, Xinglongxi Road, Bobai County	22.2729	109.97	450923100005	Locals found	MB	2
Yunlin	Yuzhou	Huanrun Cement plant, Yunzhou District	22.5611	110.205	450922104205	Locals found	MI	0
Yunlin	Bobai	Longtan Town, Bobai County	21.743	109.758		Locals found	MB	1
Yunlin	Bobai	Lingjiao Town Hospital, Bobai County	21.9998	109.663	450923116001	Locals found	MB	1
Chongzuo	Jiangzhou	Mengjing Village, Luobai Town, Jiangzhou District	22.3281	107.533	451402201205	Locals found	MB	1
Chongzuo	Ningming	Youfu Village, Haiyan Town, Ningming County	22.0627	107.504	451422103211	Locals found	MB	2
Chongzuo	Fusui	No 85, Nanmi Road, Fusui County	22.6365	107.909	451421100001	Locals found	MB	5
Chongzuo	Jiangzhou	Railway Forestry Farm Workers'Dormitory, Jiangzhou District	22.4052	107.352	451402103001	Locals found	MB	196
Chongzuo	Fusui	No 186, Songjiang Road, Fusui County	22.635	107.904	451421100001	Locals found	MB	8
Fangchenggang	Shangsi	Huanlan Town Hospital, Shangsi County	21.7513	108.251	450621102000	Locals found	MB	2
Laibin	Xingbin	Qianjian Town Xingbin District	23.613	108.965	451302104000	Locals found	MI	0
Total								305
notes: MI: T. rubrofasciata morphological identification through image from local people MB: T. rubrofasciata morphological identification through the collected bugs
